# Supplementary material
Source: publisher figshare collection journal article supplement (https://tandf.figshare.com/ndownloader/files/20047565)
Supplement: Supplementary file 1 [file 20047565]

**Table S1.** Frontier molecular orbital energies (eV) and compositions (%) in the ground state for complex **1**. (Ir, bor and ppySO2F denote the iridium atom, 2-(3-sulfonylfluorophenyl)pyridine moiety and tetrakis-pyrazolyl borate moiety, respectively, in the complex.)

| MO | Energy | Compositions | | | Assignment |
| --- | --- | --- | --- | --- | --- |
|  |  | Ir | bor | ppySO2F |  |
| L+10 | 0.73 | 4 | 88 | 8 | π*(bor+ppySO2F) |
| L+9 | 0.67 | 1 | 8 | 91 | π*(ppySO2F) |
| L+8 | 0.58 | 3 | 4 | 93 | π*(ppySO2F) |
| L+7 | 0.33 | 2 | 90 | 7 | π*(bor) |
| L+6 | 0.05 | 4 | 90 | 7 | π*(bor) |
| L+5 | -0.43 | 2 | 1 | 97 | π*(ppySO2F) |
| L+4 | -0.51 | 2 | 1 | 97 | π*(ppySO2F) |
| L+3 | -1.04 | 4 | 1 | 95 | π*(ppySO2F) |
| L+2 | -1.16 | 2 | 1 | 96 | π*(ppySO2F) |
| L+1 | -1.41 | 4 | 1 | 95 | π*(ppySO2F) |
| L | -1.58 | 2 | 1 | 97 | π*(ppySO2F) |
| HOMO–LUMO energy gap ( 4.39 eV ) | | | | | |
| H | -5.97 | 31 | 7 | 62 | d(Ir)+π(ppySO2F) |
| H-1 | -6.05 | 32 | 7 | 61 | d(Ir)+π(ppySO2F) |
| H-2 | -6.25 | 40 | 2 | 57 | d(Ir)+π(ppySO2F) |
| H-3 | -6.74 | 11 | 66 | 24 | d(Ir)+π(bor+ppySO2F) |
| H-4 | -6.75 | 7 | 71 | 22 | π(bor+ppySO2F) |
| H-5 | -6.79 | 18 | 45 | 36 | d(Ir)+π(bor+ppySO2F) |
| H-6 | -6.9 | 7 | 28 | 65 | π(bor+ppySO2F) |
| H-7 | -6.96 | 6 | 59 | 34 | π(bor+ppySO2F) |
| H-8 | -7.05 | 2 | 85 | 13 | π(bor+ppySO2F) |
| H-9 | -7.19 | 6 | 15 | 79 | π(bor+ppySO2F) |
| H-10 | -7.24 | 3 | 92 | 5 | π(bor+ppySO2F) |
|  |  |  |  |  |  |

**Table S2.** Frontier molecular orbital energies (eV) and compositions (%) in the ground state for complex **2**. (Ir, bor and ppySO2F denote the iridium atom, 2-(3-sulfonylfluorophenyl)pyridine moiety and tetrakis-pyrazolyl borate moiety, respectively, in the complex.)

| MO | Energy | Compositions | | | Assignment |
| --- | --- | --- | --- | --- | --- |
|  |  | Ir | bor | ppySO2F |  |
| L+10 | 0.65 | 13 | 74 | 14 | d*(Ir)+π*(bor+ppySO2F) |
| L+9 | 0.43 | 1 | 3 | 96 | π*(ppySO2F) |
| L+8 | 0.35 | 3 | 7 | 90 | π*(ppySO2F) |
| L+7 | 0.20 | 3 | 83 | 14 | π*(bor+ppySO2F) |
| L+6 | -0.06 | 4 | 90 | 6 | π*(bor) |
| L+5 | -0.90 | 2 | 0 | 98 | π*(ppySO2F) |
| L+4 | -0.96 | 2 | 0 | 98 | π*(ppySO2F) |
| L+3 | -1.14 | 5 | 1 | 95 | π*(ppySO2F) |
| L+2 | -1.29 | 3 | 1 | 96 | π*(ppySO2F) |
| L+1 | -1.75 | 4 | 1 | 95 | π*(ppySO2F) |
| L | -1.88 | 3 | 1 | 96 | π*(ppySO2F) |
| HOMO–LUMO energy gap ( 4.52 eV ) | | | | | |
| H | -6.40 | 46 | 8 | 47 | d(Ir)+π(ppySO2F) |
| H-1 | -6.61 | 52 | 30 | 19 | d(Ir)+π(bor+ppySO2F) |
| H-2 | -6.65 | 45 | 29 | 25 | d(Ir)+π(bor+ppySO2F) |
| H-3 | -6.80 | 1 | 97 | 3 | π(bor) |
| H-4 | -6.92 | 4 | 85 | 11 | π(bor+ppySO2F) |
| H-5 | -7.05 | 2 | 21 | 77 | π(bor+ppySO2F) |
| H-6 | -7.10 | 1 | 86 | 13 | π(bor+ppySO2F) |
| H-7 | -7.28 | 2 | 92 | 5 | π(bor) |
| H-8 | -7.31 | 6 | 12 | 82 | π(bor+ppySO2F) |
| H-9 | -7.47 | 4 | 91 | 6 | π(bor) |
| H-10 | -7.60 | 2 | 14 | 84 | π(bor+ppySO2F) |
|  |  |  |  |  |  |

**Table S3.** Frontier molecular orbital energies (eV) and compositions (%) in the ground state for complex **3**. (Ir, bor and ppySO2F denote the iridium atom, 2-(3-sulfonylfluorophenyl)pyridine moiety and tetrakis-pyrazolyl borate moiety, respectively, in the complex.)

| MO | Energy | Compositions | | | Assignment |
| --- | --- | --- | --- | --- | --- |
|  |  | Ir | bor | ppySO2F |  |
| L+10 | 0.62 | 24 | 54 | 22 | d*(Ir)+π*(bor+ppySO2F) |
| L+9 | 0.41 | 1 | 4 | 96 | π*(ppySO2F) |
| L+8 | 0.33 | 3 | 6 | 91 | π*(ppySO2F) |
| L+7 | 0.17 | 3 | 86 | 10 | π*(bor+ppySO2F) |
| L+6 | -0.09 | 4 | 92 | 4 | π*(bor) |
| L+5 | -1.03 | 2 | 0 | 98 | π*(ppySO2F) |
| L+4 | -1.07 | 2 | 0 | 98 | π*(ppySO2F) |
| L+3 | -1.18 | 4 | 1 | 95 | π*(ppySO2F) |
| L+2 | -1.36 | 3 | 1 | 96 | π*(ppySO2F) |
| L+1 | -1.82 | 4 | 1 | 95 | π*(ppySO2F) |
| L | -1.94 | 3 | 1 | 96 | π*(ppySO2F) |
| HOMO–LUMO energy gap ( 4.51 eV ) | | | | | |
| H | -6.45 | 45 | 7 | 48 | d(Ir)+π(ppySO2F) |
| H-1 | -6.69 | 50 | 34 | 16 | d(Ir)+π(bor+ppySO2F) |
| H-2 | -6.72 | 42 | 36 | 22 | d(Ir)+π(bor+ppySO2F) |
| H-3 | -6.82 | 1 | 96 | 2 | π(bor) |
| H-4 | -6.94 | 5 | 86 | 8 | π(bor) |
| H-5 | -7.09 | 2 | 36 | 62 | π(bor+ppySO2F) |
| H-6 | -7.13 | 1 | 70 | 30 | π(bor+ppySO2F) |
| H-7 | -7.30 | 3 | 95 | 2 | π(bor) |
| H-8 | -7.36 | 6 | 10 | 84 | π(bor+ppySO2F) |
| H-9 | -7.50 | 4 | 91 | 5 | π(bor) |
| H-10 | -7.64 | 2 | 11 | 87 | π(bor+ppySO2F) |
|  |  |  |  |  |  |

**Table S4.** Frontier molecular orbital energies (eV) and compositions (%) in the ground state for complex **4**. (Ir, bor and ppySO2F denote the iridium atom, 2-(3-sulfonylfluorophenyl)pyridine moiety and tetrakis-pyrazolyl borate moiety, respectively, in the complex.)

| MO | Energy | Compositions | | | Assignment |
| --- | --- | --- | --- | --- | --- |
|  |  | Ir | bor | ppySO2F |  |
| L+10 | 0.34 | 43 | 15 | 42 | d*(Ir)+π*(bor+ppySO2F) |
| L+9 | 0.05 | 5 | 77 | 18 | π*(bor+ppySO2F) |
| L+8 | -0.03 | 1 | 3 | 96 | π*(ppySO2F) |
| L+7 | -0.14 | 1 | 12 | 87 | π*(bor+ppySO2F) |
| L+6 | -0.23 | 5 | 89 | 6 | π*(bor) |
| L+5 | -1.33 | 5 | 1 | 94 | π*(ppySO2F) |
| L+4 | -1.36 | 2 | 1 | 97 | π*(ppySO2F) |
| L+3 | -1.75 | 1 | 0 | 99 | π*(ppySO2F) |
| L+2 | -1.93 | 1 | 1 | 99 | π*(ppySO2F) |
| L+1 | -2.60 | 4 | 1 | 95 | π*(ppySO2F) |
| L | -2.68 | 4 | 1 | 95 | π*(ppySO2F) |
| HOMO–LUMO energy gap ( 4.04 eV ) | | | | | |
| H | -6.72 | 43 | 12 | 45 | d(Ir)+π(bor+ppySO2F) |
| H-1 | -6.88 | 4 | 91 | 5 | π(bor) |
| H-2 | -6.94 | 36 | 49 | 15 | d(Ir)+π(bor+ppySO2F) |
| H-3 | -6.96 | 27 | 61 | 12 | d(Ir)+π(bor+ppySO2F) |
| H-4 | -7.06 | 17 | 74 | 9 | d(Ir)+π(bor) |
| H-5 | -7.21 | 4 | 93 | 3 | π(bor) |
| H-6 | -7.39 | 5 | 85 | 10 | π(bor+ppySO2F) |
| H-7 | -7.42 | 0 | 15 | 84 | π(bor+ppySO2F) |
| H-8 | -7.60 | 4 | 55 | 41 | π(bor+ppySO2F) |
| H-9 | -7.67 | 4 | 45 | 51 | π(bor+ppySO2F) |
| H-10 | -7.82 | 2 | 43 | 56 | π(bor+ppySO2F) |
|  |  |  |  |  |  |

**Table S5.** Frontier molecular orbital energies (eV) and compositions (%) in the ground state for complex **5**. (Ir, bor and ppySO2F denote the iridium atom, 2-(3-sulfonylfluorophenyl)pyridine moiety and tetrakis-pyrazolyl borate moiety, respectively, in the complex.)

| MO | Energy | Compositions | | | Assignment |
| --- | --- | --- | --- | --- | --- |
|  |  | Ir | bor | ppySO2F |  |
| L+10 | 0.55 | 38 | 26 | 36 | d*(Ir)+π*(bor+ppySO2F) |
| L+9 | 0.32 | 1 | 5 | 94 | π*(ppySO2F) |
| L+8 | 0.25 | 4 | 7 | 89 | π*(ppySO2F) |
| L+7 | 0.13 | 3 | 83 | 14 | π*(bor+ppySO2F) |
| L+6 | -0.13 | 4 | 91 | 4 | π*(bor) |
| L+5 | -1.05 | 2 | 0 | 98 | π*(ppySO2F) |
| L+4 | -1.09 | 2 | 0 | 98 | π*(ppySO2F) |
| L+3 | -1.27 | 5 | 1 | 95 | π*(ppySO2F) |
| L+2 | -1.42 | 3 | 2 | 95 | π*(ppySO2F) |
| L+1 | -1.88 | 4 | 1 | 96 | π*(ppySO2F) |
| L | -2.02 | 2 | 1 | 97 | π*(ppySO2F) |
| HOMO–LUMO energy gap ( 4.51 eV ) | | | | | |
| H | -6.53 | 47 | 10 | 43 | d(Ir)+π(bor+ppySO2F) |
| H-1 | -6.73 | 50 | 33 | 17 | d(Ir)+π(bor+ppySO2F) |
| H-2 | -6.76 | 40 | 36 | 23 | d(Ir)+π(bor+ppySO2F) |
| H-3 | -6.85 | 3 | 95 | 2 | π(bor) |
| H-4 | -6.97 | 5 | 91 | 5 | π(bor) |
| H-5 | -7.14 | 2 | 93 | 5 | π(bor) |
| H-6 | -7.25 | 1 | 9 | 91 | π(ppySO2F) |
| H-7 | -7.33 | 3 | 95 | 2 | π(bor) |
| H-8 | -7.47 | 4 | 23 | 73 | π(bor+ppySO2F) |
| H-9 | -7.55 | 4 | 76 | 19 | π(bor+ppySO2F) |
| H-10 | -7.70 | 2 | 20 | 78 | π(bor+ppySO2F) |
|  |  |  |  |  |  |

**Table S6.** Selected calculated wavelength λ(nm), oscillator strength *f*, major contribution and transition characters for complexes **1**–**5**. (H and L indicate HOMO and LUMO, respectively.)

|  | State | λ(nm)/E(eV) | *f* | Configuration | Assignment | Nature |
| --- | --- | --- | --- | --- | --- | --- |
| **1** | S1 | 350/3.53 | 0.0185 | H→L(81%) | d(Ir)+π(ppySO2F)→π*(ppySO2F) | MLCT/ILCT |
|  | S5 | 329/3.76 | 0.2271 | H-2→L(83%) | d(Ir)+π(ppySO2F)→π*(ppySO2F) | MLCT/ILCT |
|  | S11 | 291/4.24 | 0.1384 | H-2→L+2(72%) | d(Ir)+π(ppySO2F)→π*(ppySO2F) | MLCT/ILCT |
|  |  |  |  | H-1→L+3(11%) | d(Ir)+π(ppySO2F)→π*(ppySO2F) | MLCT/ILCT |
|  | S19 | 265/4.67 | 0.1744 | H→L+4(23%) | d(Ir)+π(ppySO2F)→π*(ppySO2F) | MLCT/ILCT |
|  |  |  |  | H-4→L(13%) | π(bor+ppySO2F)→π*(ppySO2F) | LLCT/ILCT |
|  | S21 | 260/4.76 | 0.4716 | H-6→L+1(29%) | π(bor+ppySO2F)→π*(ppySO2F) | LLCT/ILCT |
|  |  |  |  | H-1→L+4(22%) | d(Ir)+π(ppySO2F)→π*(ppySO2F) | MLCT/ILCT |
|  | S26 | 255/4.85 | 0.2352 | H-7→L(18%) | π(bor+ppySO2F)→π*(ppySO2F) | LLCT/ILCT |
|  |  |  |  | H-8→L(14%) | π(bor+ppySO2F)→π*(ppySO2F) | LLCT/ILCT |
|  | S30 | 252/4.91 | 0.1339 | H-2→L+4(22%) | d(Ir)+π(ppySO2F)→π*(ppySO2F) | MLCT/ILCT |
|  |  |  |  | H-5→L+2(19%) | d(Ir)+π(bor+ppySO2F)→π*(ppySO2F) | MLCT/LLCT/ILCT |
|  | S31 | 251/4.92 | 0.1921 | H-9→L(26%) | π(bor+ppySO2F)→π*(ppySO2F) | LLCT/ILCT |
|  |  |  |  | H-8→L(16%) | π(bor+ppySO2F)→π*(ppySO2F) | LLCT/ILCT |
|  | S35 | 247/5.01 | 0.1511 | H-9→L(31%) | π(bor+ppySO2F)→π*(ppySO2F) | LLCT/ILCT |
|  |  |  |  | H-7→L+1(12%) | π(bor+ppySO2F)→π*(ppySO2F) | LLCT/ILCT |
|  | S45 | 236/5.23 | 0.2561 | H-4→L+3(15%) | π(bor+ppySO2F)→π*(ppySO2F) | LLCT/ILCT |
|  |  |  |  | H-6→L+2(12%) | π(bor+ppySO2F)→π*(ppySO2F) | LLCT/ILCT |
|  | S47 | 234/5.28 | 0.1531 | H-7→L+2(19%) | π(bor+ppySO2F)→π*(ppySO2F) | LLCT/ILCT |
|  |  |  |  | H-6→L+3(17%) | π(bor+ppySO2F)→π*(ppySO2F) | LLCT/ILCT |
| **2** | S1 | 352/3.51 | 0.0214 | H→L(95%) | d(Ir)+π(ppySO2F)→π*(ppySO2F) | MLCT/ILCT |
|  | S5 | 319/3.88 | 0.1594 | H-1→L+1(52%) | d(Ir)+π(bor+ppySO2F)→π*(ppySO2F) | MLCT/LLCT/ILCT |
|  |  |  |  | H-2→L(40%) | d(Ir)+π(bor+ppySO2F)→π*(ppySO2F) | MLCT/LLCT/ILCT |
|  | S25 | 257/4.80 | 0.1648 | H-8→L+1(25%) | π(bor+ppySO2F)→π*(ppySO2F) | LLCT/ILCT |
|  |  |  |  | H-2→L+3(15%) | d(Ir)+π(bor+ppySO2F)→π*(ppySO2F) | MLCT/LLCT/ILCT |
|  | S29 | 253/4.89 | 0.1707 | H-2→L+4(21%) | d(Ir)+π(bor+ppySO2F)→π*(ppySO2F) | MLCT/LLCT/ILCT |
|  |  |  |  | H-8→L(15%) | π(bor+ppySO2F)→π*(ppySO2F) | LLCT/ILCT |
|  | S31 | 251/4.92 | 0.1057 | H-1→L+5(18%) | d(Ir)+π(bor+ppySO2F)→π*(ppySO2F) | MLCT/LLCT/ILCT |
|  |  |  |  | H-2→L+5(17%) | d(Ir)+π(bor+ppySO2F)→π*(ppySO2F) | MLCT/LLCT/ILCT |
|  | S40 | 240/5.16 | 0.2378 | H-3→L+3(21%) | π(bor)→π*(ppySO2F) | LLCT |
|  |  |  |  | H-5→L+2(20%) | π(bor+ppySO2F)→π*(ppySO2F) | LLCT/ILCT |
|  | S41 | 239/5.16 | 0.1266 | H-10→L+1(18%) | π(bor+ppySO2F)→π*(ppySO2F) | LLCT/ILCT |
|  |  |  |  | H-5→L+3(13%) | π(bor+ppySO2F)→π*(ppySO2F) | LLCT/ILCT |
| **3** | S1 | 354/3.50 | 0.0215 | H→L(95%) | d(Ir)+π(ppySO2F)→π*(ppySO2F) | MLCT/ILCT |
|  | S5 | 318/3.88 | 0.1284 | H-1→L+1(50%) | d(Ir)+π(bor+ppySO2F)→π*(ppySO2F) | MLCT/LLCT/ILCT |
|  |  |  |  | H-2→L(43%) | d(Ir)+π(bor+ppySO2F)→π*(ppySO2F) | MLCT/LLCT/ILCT |
|  | S15 | 274/4.52 | 0.1052 | H-5→L+1(25%) | π(bor+ppySO2F)→π*(ppySO2F) | LLCT/ILCT |
|  |  |  |  | H-6→L(15%) | π(bor+ppySO2F)→π*(ppySO2F) | LLCT/ILCT |
|  | S27 | 258/4.80 | 0.1633 | H-2→L+4(19%) | d(Ir)+π(bor+ppySO2F)→π*(ppySO2F) | MLCT/LLCT/ILCT |
|  |  |  |  | H-5→L+2(13%) | π(bor+ppySO2F)→π*(ppySO2F) | LLCT/ILCT |
|  | S32 | 253/4.88 | 0.1237 | H-3→L+2(26%) | π(bor)→π*(ppySO2F) | LLCT |
|  |  |  |  | H-2→L+5(20%) | d(Ir)+π(bor+ppySO2F)→π*(ppySO2F) | MLCT/LLCT/ILCT |
|  | S41 | 240/5.15 | 0.1355 | H-10→L+1(16%) | π(bor+ppySO2F)→π*(ppySO2F) | LLCT/ILCT |
|  |  |  |  | H-4→L+2(14%) | π(bor)→π*(ppySO2F) | ILCT |
| **4** | S1 | 400/3.09 | 0.0029 | H→L(95%) | d(Ir)+π(bor+ppySO2F)→π*(ppySO2F) | MLCT/LLCT/ILCT |
|  | S5 | 356/3.47 | 0.2217 | H-2→L+1(25%) | d(Ir)+π(bor+ppySO2F)→π*(ppySO2F) | MLCT/LLCT/ILCT |
|  |  |  |  | H-3→L(22%) | d(Ir)+π(bor+ppySO2F)→π*(ppySO2F) | MLCT/LLCT/ILCT |
|  | S15 | 305/4.06 | 0.0961 | H-7→L+1(54%) | π(bor+ppySO2F)→π*(ppySO2F) | LLCT/ILCT |
|  | S31 | 274/4.51 | 0.1463 | H→L+4(42%) | d(Ir)+π(bor+ppySO2F)→π*(ppySO2F) | MLCT/LLCT/ILCT |
|  |  |  |  | H-1→L+2(14%) | π(bor)→π*(ppySO2F) | LLCT |
|  | S45 | 256/4.84 | 0.1315 | H-3→L+5(23%) | d(Ir)+π(bor+ppySO2F)→π*(ppySO2F) | MLCT/LLCT/ILCT |
|  |  |  |  | H-7→L+2(15%) | π(bor+ppySO2F)→π*(ppySO2F) | LLCT/ILCT |
|  | S50 | 248/4.97 | 0.3125 | H-7→L+3(46%) | π(bor+ppySO2F)→π*(ppySO2F) | LLCT/ILCT |
| **5** | S1 | 352/3.51 | 0.0247 | H→L(95%) | d(Ir)+π(bor+ppySO2F)→π*(ppySO2F) | MLCT/LLCT/ILCT |
|  | S5 | 320/3.87 | 0.1001 | H-1→L+1(61%) | d(Ir)+π(bor+ppySO2F)→π*(ppySO2F) | MLCT/LLCT/ILCT |
|  |  |  |  | H-2→L(25%) | d(Ir)+π(bor+ppySO2F)→π*(ppySO2F) | MLCT/LLCT/ILCT |
|  | S18 | 270/4.59 | 0.0758 | H→L+4(38%) | d(Ir)+π(bor+ppySO2F)→π*(ppySO2F) | MLCT/LLCT/ILCT |
|  |  |  |  | H→L+5(14%) | d(Ir)+π(bor+ppySO2F)→π*(ppySO2F) | MLCT/LLCT/ILCT |
|  | S23 | 262/4.72 | 0.0736 | H-1→L+4(50%) | d(Ir)+π(bor+ppySO2F)→π*(ppySO2F) | MLCT/LLCT/ILCT |
|  |  |  |  | H-8→L(12%) | π(bor+ppySO2F)→π*(ppySO2F) | LLCT/ILCT |
|  | S30 | 254/4.86 | 0.2093 | H-2→L+4(25%) | d(Ir)+π(bor+ppySO2F)→π*(ppySO2F) | MLCT/LLCT/ILCT |
|  |  |  |  | H-6→L+2(19%) | π(ppySO2F)→π*(ppySO2F) | ILCT |
|  | S32 | 252/4.90 | 0.1464 | H-7→L+1(29%) | π(bor)→π*(ppySO2F) | ILCT |
|  |  |  |  | H-8→L+1(22%) | π(bor+ppySO2F)→π*(ppySO2F) | LLCT/ILCT |
|  | S46 | 238/5.21 | 0.1796 | H-6→L+2(35%) | π(ppySO2F)→π*(ppySO2F) | ILCT |
|  | S51 | 233/5.30 | 0.1762 | H-6→L+3(39%) | π(ppySO2F)→π*(ppySO2F) | ILCT |

**Table S7.** Partial frontier molecular orbital composition (%) of complexes **1**–**5** in the triplet excited states. (H and L indicate HOMO and LUMO, respectively)

|  | MO | Energy/eV | Composition (%) | | | Assignment |
| --- | --- | --- | --- | --- | --- | --- |
|  |  |  | Ir | bor | ppySO2F |  |
| **1** | L | -1.86 | 2 | 1 | 98 | π*(ppySO2F) |
|  | H | -5.75 | 35 | 5 | 60 | d(Ir)+π(ppySO2F) |
|  | H-2 | -6.29 | 41 | 2 | 56 | d(Ir)+π(ppySO2F) |
| **2** | L+1 | -1.85 | 5 | 1 | 95 | π*(ppySO2F) |
|  | L | -2.14 | 3 | 1 | 96 | π*(ppySO2F) |
|  | H | -6.28 | 42 | 5 | 53 | d(Ir)+π(ppySO2F) |
|  | H-1 | -6.61 | 46 | 28 | 26 | d(Ir)+π(bor+ppySO2F) |
| **3** | L+1 | -1.91 | 5 | 1 | 94 | π*(ppySO2F) |
|  | L | -2.19 | 3 | 1 | 96 | π*(ppySO2F) |
|  | H | -6.32 | 40 | 5 | 56 | d(Ir)+π(ppySO2F) |
|  | H-1 | -6.69 | 44 | 32 | 25 | d(Ir)+π(bor+ppySO2F) |
| **4** | L+1 | -2.68 | 5 | 1 | 94 | π*(ppySO2F) |
|  | L | -2.85 | 4 | 1 | 96 | π*(ppySO2F) |
|  | H | -6.64 | 44 | 11 | 46 | d(Ir)+π(bor+ppySO2F) |
|  | H-2 | -6.49 | 30 | 56 | 14 | d(Ir)+π(bor+ppySO2F) |
| **5** | L+1 | -2.00 | 4 | 1 | 95 | π*(ppySO2F) |
|  | L | -2.28 | 3 | 1 | 96 | π*(ppySO2F) |
|  | H | -6.42 | 43 | 6 | 51 | d(Ir)+π(ppySO2F) |
|  | H-1 | -6.73 | 45 | 35 | 20 | d(Ir)+π(bor+ppySO2F) |
